# Supplementary material for: Synthesis of peptide–siRNA conjugates via internal sulfonylphosphoramidate modifications and evaluation of their in vitro activity
Source: PubMed Central journal article supplement (PMC10783514; doi:10.1093/nar/gkad1015), 2023-11-16

## Supplementary Information

### Synthesis of peptide-siRNA conjugates via internal sulfonylphosphoramidate modifications and evaluation of their *in vitro* activity

Jakob Melgaard Smidt<sup>1</sup>, Lennart Lykke<sup>2\*</sup>, Carsten Enggaard Stidsen<sup>3</sup>, Nuša Pristovšek<sup>3</sup>, Kurt V. Gothelf<sup>1\*</sup>.

<sup>1</sup> Interdisciplinary Nanoscience Center (iNANO) and Department of Chemistry, Aarhus University, 8000 Aarhus, Denmark

<sup>2</sup> Research Chemistry, Novo Nordisk A/S, Novo Nordisk Park, 2760 Måløv, Denmark.

<sup>3</sup> Centre for Functional Assays and Screening, Novo Nordisk A/S, Novo Nordisk Park, 2760 Måløv, Denmark.

#### Supplementary figures

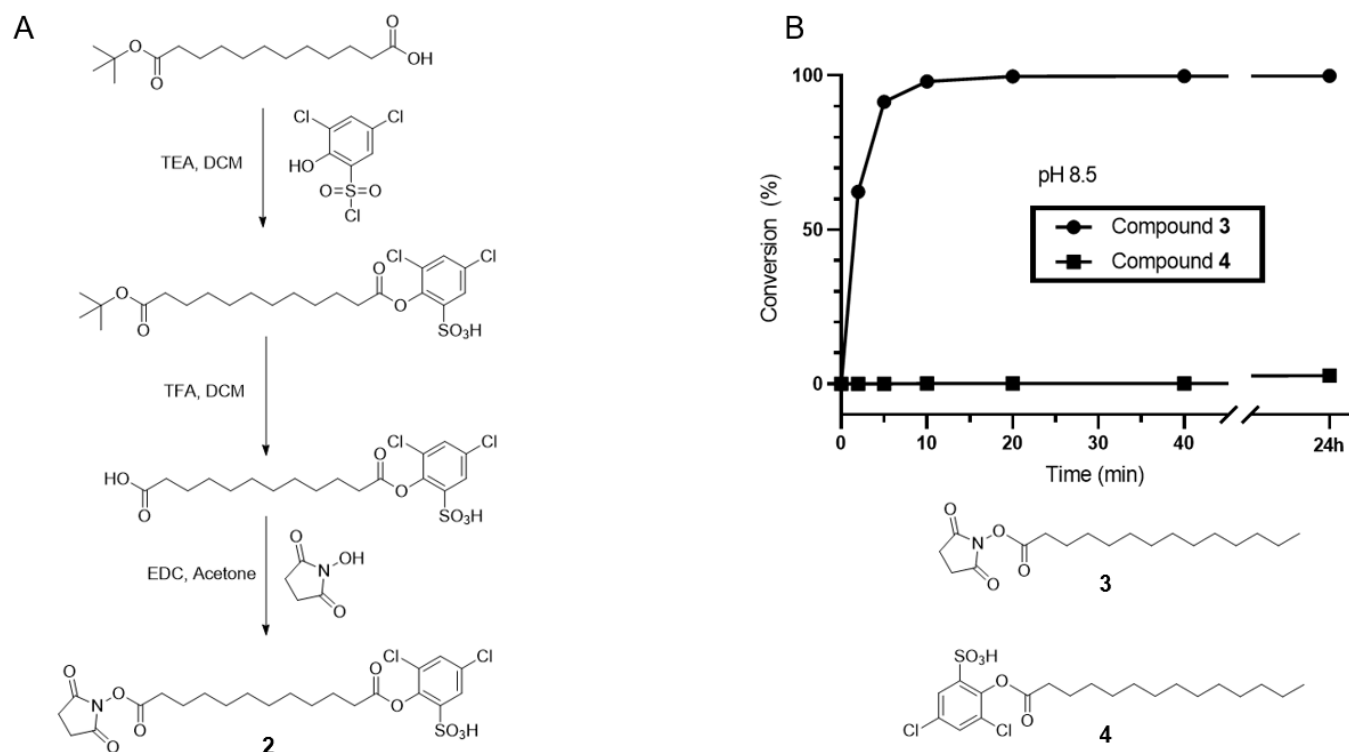

**Supplementary Figure S1.** Synthesis of compound **2** and reactivity of NHS and DCSP linkers. **(A)** Synthesis of compound **2**. **(B)** Reaction conversion of NHS-C14 (compound **3**) and DCSP-C14 (compound **4**) linker reacting with amine-modified oligonucleotide at pH 8.5. Conversion determined by HPLC analysis.

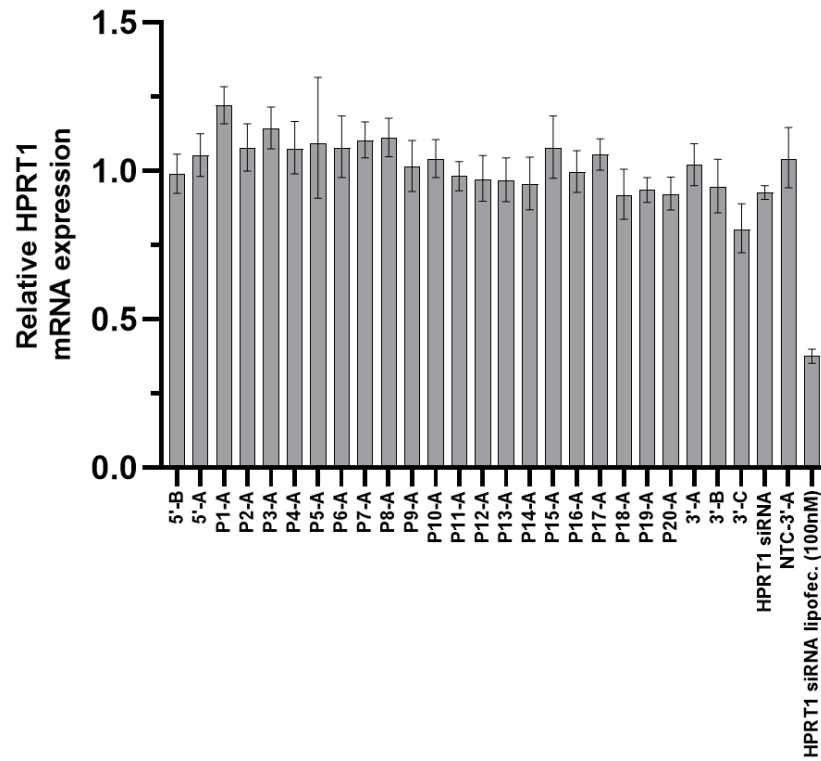

**Supplementary Figure S2.** Knockdown study without transfection in murine pancreatic  $\beta$ -cells. MIN6 cells were treated with 1  $\mu$ M of different GLP1-siRNA constructs without the use of a transfection agent. A positive control was made with 100 nM free HPRT1 siRNA using transfection. No productive free uptake was observed for any of the compounds compared to the NTC construct. Data presented as mean and SD of n=3 biological replicates.

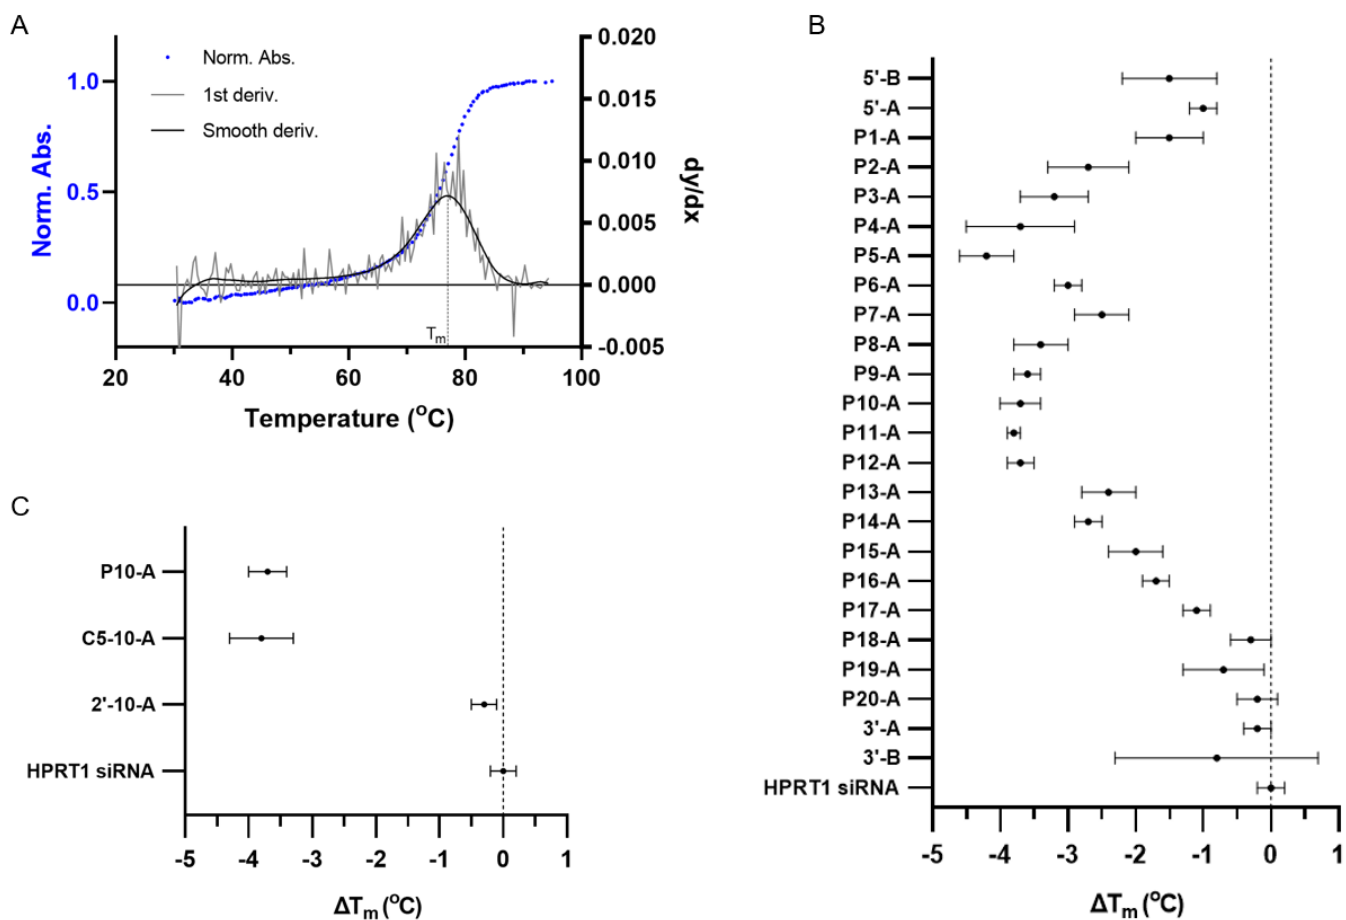

**Supplementary Figure S3.** Melting study of siRNA duplex in GLP1-siRNA conjugates. **(A)** Representative example of a melting curve of a GLP1-siRNA conjugate. Absorbance was measured at 260 nm and the first derivative was calculated and smoothed. The highest point of the smooth derivative curve was used to determine  $T_m$ . **(B)**  $\Delta T_m$  of regioisomeric GLP1-siRNA conjugates compared to free HPRT1 siRNA. **(C)**  $\Delta T_m$  of GLP1-siRNA conjugates made with different conjugation strategies at position 10. Data points represent mean and SD from  $n=3$  independent experiments.

| Compound name | GLP1R activation         |                        |                               | Melting                      |                               | HPRT1 knockdown       |
|---------------|--------------------------|------------------------|-------------------------------|------------------------------|-------------------------------|-----------------------|
|               | EC50 (95% CI)<br>[pM]    | Fold change<br>in EC50 | E <sub>max</sub> (±SD)<br>[%] | T <sub>m</sub> (±SD)<br>[°C] | ΔT <sub>m</sub> (±SD)<br>[°C] | IC50 (95% CI)<br>[pM] |
| 5'-B          | 1395.5 (1094.8 – 1778.8) | 124                    | 100 (± 2)                     | 79.1 (0.7)                   | -1.5 (0.7)                    | -                     |
| 5'-A          | 47.8 (25.8 – 88.6)       | 5                      | 91 (± 4)                      | 79.6 (0.1)                   | -1.0 (0.2)                    | -                     |
| P1-A          | 69.0 (54.9 – 86.8)       | 8                      | 97 (± 8)                      | 79.1 (0.5)                   | -1.5 (0.5)                    | -                     |
| P2-A          | 48.8 (40.2 – 59.1)       | 5                      | 98 (± 8)                      | 77.9 (0.6)                   | -2.7 (0.6)                    | -                     |
| P3-A          | 102.0 (76.9 – 135.3)     | 11                     | 95 (± 5)                      | 77.4 (0.5)                   | -3.2 (0.5)                    | -                     |
| P4-A          | 319.6 (156.0 – 654.7)    | 36                     | 92 (± 6)                      | 76.9 (0.8)                   | -3.7 (0.8)                    | -                     |
| P5-A          | 271.9 (216.9 – 340.9)    | 30                     | 91 (± 5)                      | 76.4 (0.4)                   | -4.2 (0.4)                    | -                     |
| P6-A          | 138.4 (74.4 – 257.5)     | 16                     | 90 (± 7)                      | 77.6 (0.1)                   | -3.0 (0.2)                    | -                     |
| P7-A          | 170.1 (145.6 – 198.8)    | 19                     | 94 (± 8)                      | 78.1 (0.4)                   | -2.5 (0.4)                    | -                     |
| P8-A          | 149.4 (105.6 – 211.3)    | 17                     | 94 (± 4)                      | 77.2 (0.4)                   | -3.4 (0.4)                    | -                     |
| P9-A          | 178.5 (156.3 – 203.9)    | 20                     | 90 (± 6)                      | 77.0 (0.2)                   | -3.6 (0.2)                    | -                     |
| P10-A         | 300.2 (114.0 – 790.2)    | 35                     | 95 (± 4)                      | 76.9 (0.3)                   | -3.7 (0.3)                    | 34.0 (26.3 – 44.0)    |
| P11-A         | 308.4 (130.5 – 728.2)    | 35                     | 94 (± 3)                      | 76.8 (0.1)                   | -3.8 (0.1)                    | -                     |
| P12-A         | 90.0 (53.2 – 152.2)      | 10                     | 99 (± 3)                      | 76.9 (0.2)                   | -3.7 (0.2)                    | -                     |
| P13-A         | 189.4 (140.8 – 254.9)    | 21                     | 97 (± 3)                      | 78.2 (0.3)                   | -2.4 (0.4)                    | -                     |
| P14-A         | 179.1 (105.1 – 305.5)    | 20                     | 94 (± 5)                      | 77.9 (0.2)                   | -2.7 (0.2)                    | -                     |
| P15-A         | 115.0 (92.7 – 142.7)     | 13                     | 92 (± 6)                      | 78.6 (0.4)                   | -2.0 (0.4)                    | -                     |
| P16-A         | 119.2 (84.3 – 168.6)     | 13                     | 96 (± 4)                      | 78.9 (0.2)                   | -1.7 (0.2)                    | -                     |
| P17-A         | 66.7 (43.7 – 101.7)      | 7                      | 98 (± 3)                      | 79.5 (0.1)                   | -1.1 (0.2)                    | -                     |
| P18-A         | 77.7 (28.2 – 213.7)      | 9                      | 100 (± 7)                     | 80.3 (0.2)                   | -0.3 (0.3)                    | -                     |
| P19-A         | 63.3 (22.1 – 181.3)      | 7                      | 92 (± 6)                      | 79.9 (0.6)                   | -0.7 (0.6)                    | -                     |
| P20-A         | 27.9 (20.3 – 38.3)       | 3                      | 88 (± 5)                      | 80.4 (0.3)                   | -0.2 (0.3)                    | -                     |
| 3'-A          | 16.8 (16.0 – 17.5)       | 2                      | 92 (± 4)                      | 80.4 (0.1)                   | -0.2 (0.2)                    | 10.1 (6.2 – 16.7)     |
| 3'-B          | 356.7 (70.0 – 1817.8)    | 37                     | 109 (± 12)                    | 79.8 (1.5)                   | -0.8 (1.5)                    | 9.2 (6.6 – 12.9)      |
| 3'-C          | >10 <sup>5</sup>         | n/a                    | n/a                           | -                            | -                             | -                     |
| NTC-3'-A      | 19.4 (7.5 – 50.2)        | 2                      | 93 (± 2)                      | 81.9 (0.1)                   | 1.3 (0.1)                     | -                     |
| C5-10-A       | -                        | -                      | -                             | 76.8 (0.5)                   | -3.8 (0.5)                    | 25.8 (11.6 – 63.2)    |
| 2'-10-A       | -                        | -                      | -                             | 80.3 (0.2)                   | -0.3 (0.2)                    | 47.9 (21.4 – 112.6)   |
| Free peptides |                          |                        |                               |                              |                               |                       |
| A             | 9.0 (8.8 – 9.3)          | 1                      | 88 (± 4)                      | -                            | -                             | -                     |
| B             | 11.1 (6.2 – 19.9)        | 1                      | 93 (± 3)                      | -                            | -                             | -                     |
| C             | >10 <sup>5</sup>         | n/a                    | n/a                           | -                            | -                             | -                     |
| Free siRNA    |                          |                        |                               |                              |                               |                       |
| HPRT1 siRNA   | -                        | -                      | -                             | 80.6 (0.1)                   | 0 (0)                         | 6.0 (4.1 – 8.7)       |
| NTC siRNA     | -                        | -                      | -                             | 82.1 (0.2)                   | 1.5 (0.3)                     | n/a                   |

**Supplementary Figure S4.** Data table from GLP1R activation, melting studies, and HPRT1 knockdown.

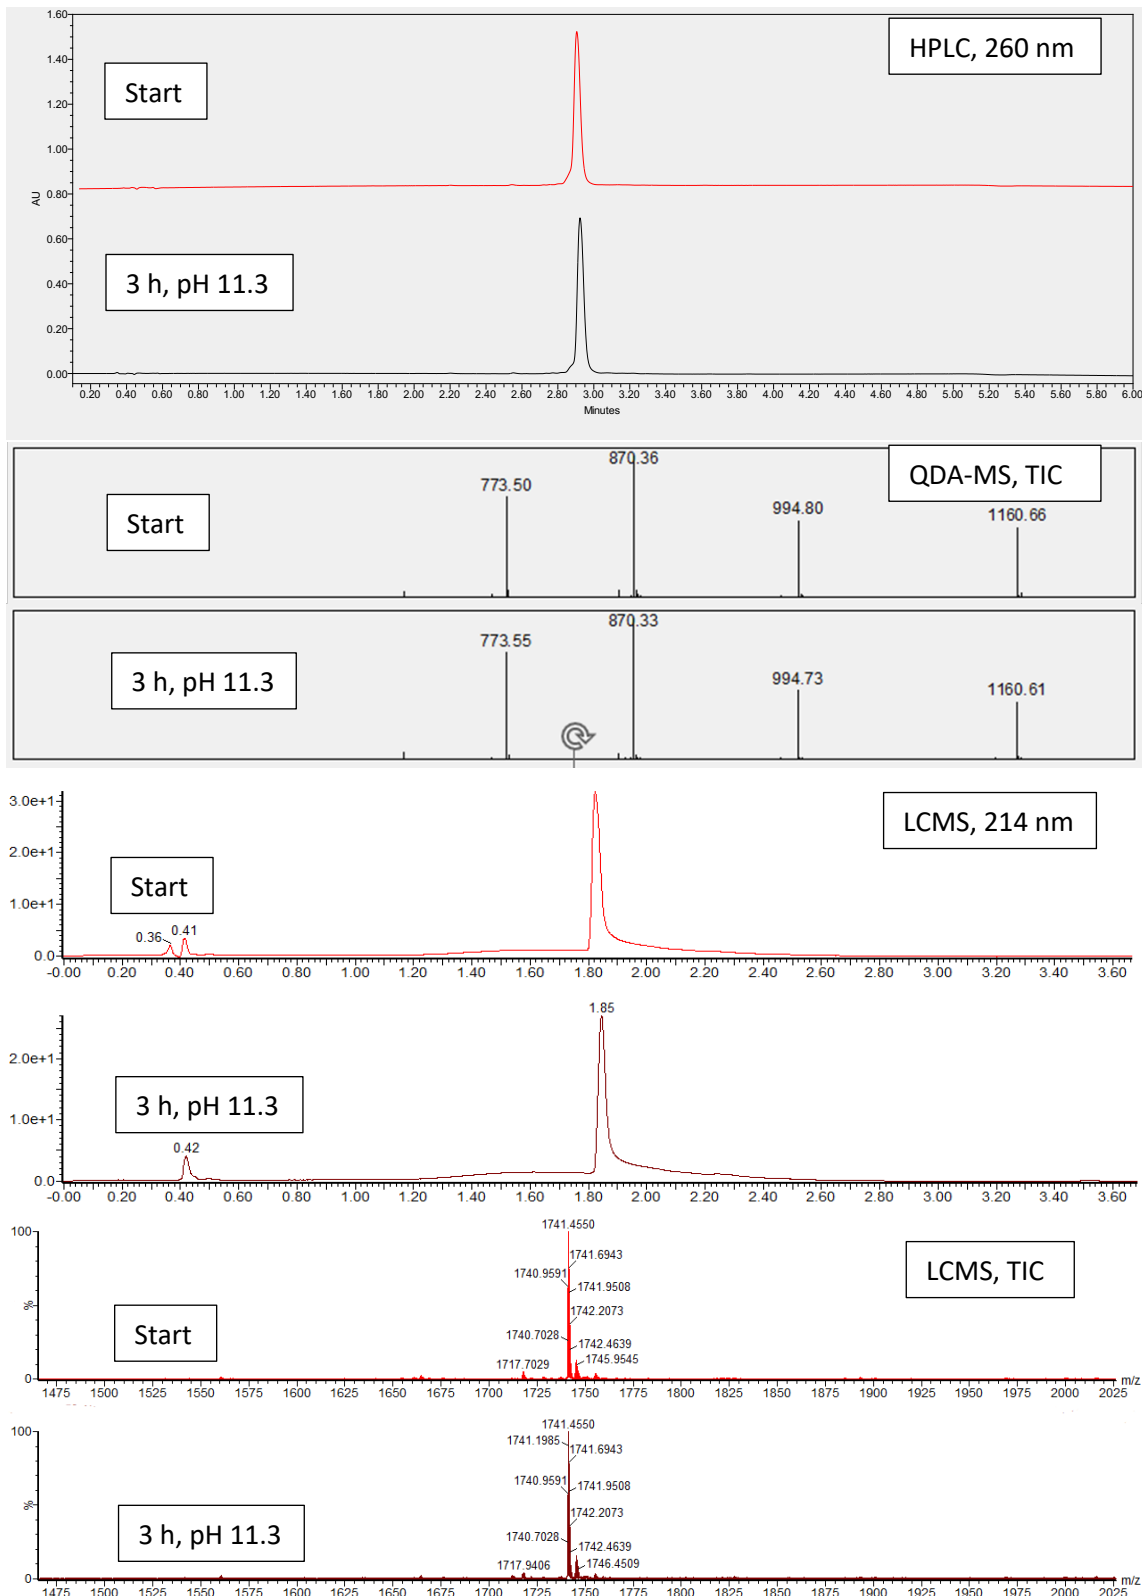

**Supplementary Figure S5.** Oligonucleotide pH-stability analysis. Amino-modified oligonucleotide (SS HPRT1 3'-amino) was incubated at pH 11.3 for 3 h and analyzed by HPLC Method B and LCMS Method A.

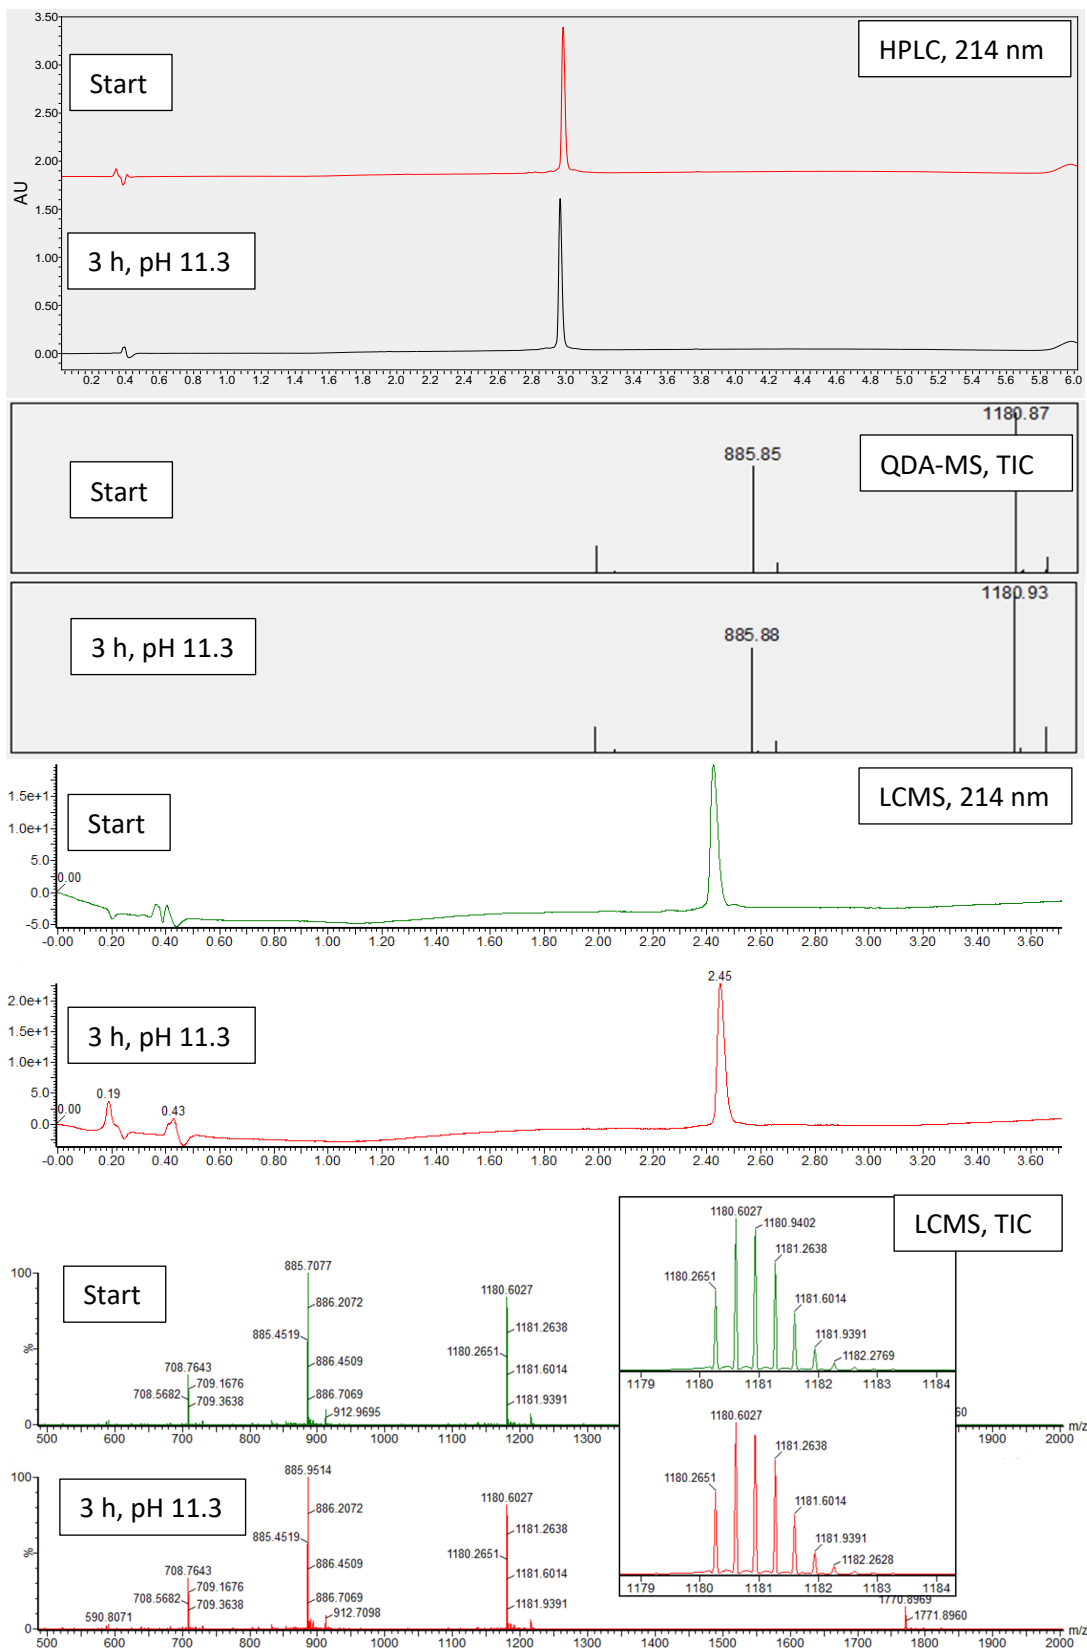

**Supplementary Figure S6.** Peptide stability analysis. Peptide A was incubated at pH 11.3 for 3 h and analyzed by HPLC Method G and LCMS Method B.

## Synthesis data

All reagents and materials used were purchased from ordinary chemical suppliers and were used without further purification. The solvents used were of standard HPLC grade.  $^1\text{H}$  NMR spectra were acquired on a Bruker Aeon-400 MHz spectrometer at ambient temperature.  $^{13}\text{C}$  NMR spectra were recorded at 100 MHz with complete proton decoupling. Samples were prepared in deuterated dimethyl sulfoxide ( $\text{DMSO-d}_6$ ) or chloroform  $\text{CDCl}_3$ . Chemical shifts are reported in ppm ( $\delta$ ) relatively to the chemical shift of the deuterated solvent. Multiplicity is reported as follows: singlet (s), doublet (d), doublet of doublets (dd), triplet (t), quartet (q), quintet (qt) and multiplet (m). Masses were confirmed by either liquid chromatography mass spectrometry (LCMS) or high-resolution mass spectrometry (HRMS). LCMS was recorded using atmospheric pressure ionization electrospray (API-ES) on a Waters Xevo G2-XS QToF, and HRMS analysis was performed on a Bruker Daltonics micrOTOF.

### 2-(1,3-Dioxoisindolin-2-yl)ethane-1-sulfonyl azide (**1**)

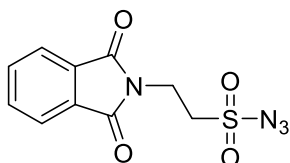

In a 500 mL round-bottomed flask equipped with a magnetic stirrer bar, 2-phthalimidoethanesulfonyl chloride (50.0 g, 183 mmol, 1 eq.) and sodium azide (14.3 g, 219 mmol, 1.2 eq.) were suspended in acetone (160 mL) and water (40 mL). The stirred suspension was cooled on an ice bath. Via an addition funnel, triethylamine (31.8 mL, 183 mmol, 1 eq.) was added over 20 min, at which point the mixture had turned into a solution and UPLC analysis indicated full conversion of sulfonyl chloride. The reaction mixture was poured into water (800 mL), and stirred for 20 min. The solid was filtered off and transferred to a 2 L conical flask containing a magnet. The solid was dissolved in minimal boiling ethanol (~500 mL). Upon slow cooling to room temperature, the product crystalized out of solution as colorless needles. The mother liquor was filtered off and the crystals were washed with ice-cold ethanol and dried under vacuum overnight to form 33 g colorless needles. 64% yield.  $^1\text{H-NMR}$  (400 MHz,  $\text{CDCl}_3$ )  $\delta$  ppm 7.98 (dd,  $J = 5.48$ , 3.04 Hz, 2H), 7.75 (dd,  $J = 5.48$ , 3.04 Hz, 2H), 4.23 (t,  $J = 6.46$  Hz, 2H), 3.73 (t,  $J = 6.46$  Hz, 2H).  $^{13}\text{C-NMR}$  (100 MHz,  $\text{CDCl}_3$ )  $\delta$  ppm 167.6 (2C), 134.6 (2C), 131.8 (2C), 123.8 (2C), 52.4, 32.3. HRMS,  $m/z$  calculated for  $\text{C}_{10}\text{H}_8\text{N}_4\text{O}_4\text{SNa}$   $[\text{M}+\text{Na}]^+$  303.0158, found 303.0155.

### 3,5-Dichloro-2-((12-((2,5-dioxopyrrolidin-1-yl)oxy)-12-oxododecanoyl)oxy)benzenesulfonic acid (**2**)

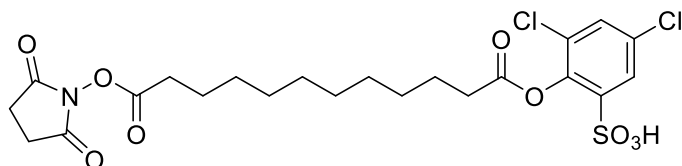

To a solution of mono-tert-butyl dodecanedioic acid (2.86 g, 10.0 mmol, 1 eq.) in DCM (20 mL) was added triethylamine (2.09 mL, 15.0 mmol, 1.5 eq.), followed by 3,5-dichloro-2-hydroxybenzenesulfonyl chloride (2.75 g, 10.5 mmol, 1.05 eq.). The mixture was stirred for 1.5 h at room temperature, then quenched by

5 w/w% NaHSO<sub>4</sub> (aq.) (50 mL), and extracted with EtOAc (50 mL). The organic phase was washed with NaHCO<sub>3</sub> (aq. sat.)/brine 1:1 (50 mL). 2-Propanol (10 mL) was added to aid phase separation. The organic phase was washed with 1 M HCl (aq.) (50 mL), followed by brine (50 mL), and dried over Na<sub>2</sub>SO<sub>4</sub>. The solvent was removed under reduced pressure. The residue was dissolved in DCM (20 mL), and cooled on an ice bath. While stirring, TFA (20 mL) was added. The ice bath was removed and the reaction was stirred at room temperature for 2 h. The reaction mixture was poured into ice-cold (0 °C) diethylether (200 mL), and the precipitate was isolated by centrifugation. The precipitate was suspended and centrifuged twice in diethylether (2 x 100 mL), and then dried under a stream of nitrogen. The precipitate was dissolved in acetone (20 mL), and stirred at room temperature when *N*-hydroxysuccinimide (2.30 g, 20.0 mmol, 2 eq.) was added. Then EDC\*HCl (2.88 g, 15.0 mmol, 1.5 eq.) was added, and the mixture was stirred for 5 h at 30 °C. The mixture was diluted with EtOAc (100 mL) and washed with 0.1 M HCl (aq.) (3 x 50 mL), followed by brine (50 mL), and finally dried over Na<sub>2</sub>SO<sub>4</sub>. The solvent volume was reduced under reduced pressure to ~10 mL, and the product was precipitated with ice-cold diethyl ether. The mother liquor was decanted off and the precipitate was redissolved in minimal acetone and precipitated from ice-cold diethylether. The mother liquor was filtered off and the product was dried under vacuum overnight to afford a white solid (2.50 g) in 45% yield. <sup>1</sup>H-NMR (400 MHz, DMSO-d<sub>6</sub>) δ ppm 7.72 (d, *J* = 2.52 Hz, 1H), 7.65 (d, *J* = 2.52 Hz, 1H), 2.81 (s, 4H), 2.65 (t, *J* = 7.18 Hz, 2H), 2.58-2.51 (m, 2H), 1.62 (dq, *J* = 7.19, 1.56 Hz, 4H), 1.41-1.24 (m, 12H). <sup>13</sup>C-NMR (100 MHz, DMSO-d<sub>6</sub>) δ ppm 170.3 (2C), 169.7, 169.0, 143.3, 142.7, 129.7, 129.5, 128.8, 126.8, 33.4, 30.2, 28.8, 28.8, 28.7, 28.5, 28.4, 28.0, 25.4 (2C), 24.3, 24.0. LCMS Method C: Rt 3.14 min, m/z calculated for C<sub>22</sub>H<sub>26</sub>Cl<sub>2</sub>NO<sub>9</sub>S [M-H]<sup>-</sup> 550.0711, found 550.0775.

### 2,5-Dioxopyrrolidin-1-yl tetradecanoate (**3**)

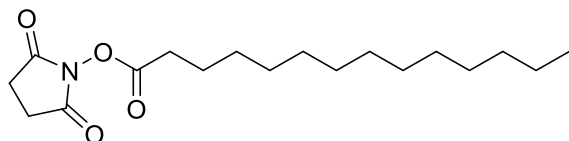

To a stirred solution of myristic acid (228 mg, 1.00 mmol, 1 eq.) in acetone (2 mL) was added *N*-hydroxysuccinimide (132 mg, 1.15 mmol, 1.15 eq.) followed by EDC\*HCl (211 mg, 1.10 mmol, 1.1 eq.). The mixture was stirred for 5 h at 30 °C. The mixture was diluted with EtOAc (10 mL) and washed with 0.1 M HCl (aq.) (2 x 10 mL), followed by brine (10 mL), and finally dried over Na<sub>2</sub>SO<sub>4</sub>. The solvent was removed under reduced pressure. The product was recrystallized from 2-propanol, then dried under vacuum overnight to afford colorless crystals (260 mg) in 80% yield. <sup>1</sup>H-NMR (400 MHz, CDCl<sub>3</sub>) δ ppm 2.82 (s, 4H), 2.59 (t, *J* = 7.50 Hz, 2H), 1.73 (qt, *J* = 7.50 Hz, 2H), 1.39 (qt, *J* = 7.28 Hz, 2H), 1.34-1.19 (m, 18H), 0.87 (t, *J* = 6.82 Hz, 3H). <sup>13</sup>C-NMR (100 MHz, CDCl<sub>3</sub>) δ ppm 169.4 (2C), 138.9, 32.1, 31.2, 29.9, 29.9, 29.8, 29.8, 29.6 (2C), 29.3, 29.0, 25.8 (2C), 24.8, 22.9, 14.3. LCMS Method C: Rt 4.58 min, m/z calculated for C<sub>18</sub>H<sub>30</sub>NO<sub>4</sub> [M-H]<sup>-</sup> 324.2180, found 324.2180.



### 3,5-Dichloro-2-(tetradecanoyloxy)benzenesulfonic acid (**4**)

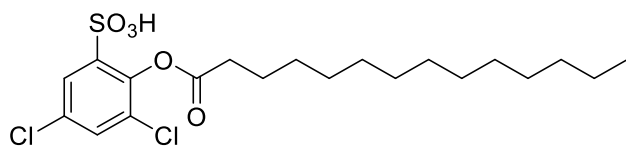

To a stirred solution of myristic acid (228 mg, 1.00 mmol, 1 eq.) in 2-MeTHF (2 mL) was added triethylamine (209  $\mu$ L, 1.50 mmol, 1.5 eq.), followed by 3,5-dichloro-2-hydroxybenzenesulfonyl chloride (288 mg, 1.10 mmol, 1.1 eq.). The mixture was stirred for 2 h at room temperature. The mixture was then diluted with EtOAc (10 mL) and filtered before washing with 5 w/w% NaHSO<sub>4</sub> (aq.) (10 mL), then with NaHCO<sub>3</sub> (aq. sat.)/brine 1:1 (10 mL). 2-Propanol (2 mL) was added to aid phase separation. The organic phase was washed with 1 M HCl (aq.) (2 x 10 mL), followed by brine (10 mL), and dried over Na<sub>2</sub>SO<sub>4</sub> and concentrated. The residue was purified by flash chromatography eluting with a gradient from DCM to 20% methanol in DCM to afford the product as a white solid (339 mg), in 75% yield. <sup>1</sup>H-NMR (400 MHz, DMSO-d<sub>6</sub>)  $\delta$  ppm 7.72 (d, *J* = 2.58 Hz, 1H), 7.64 (d, *J* = 2.58 Hz, 1H), 2.56-2.49 (m, 2H), 1.62 (qt, *J* = 7.60 Hz, 2H), 1.41-1.19 (m, 20H), 0.85 (t, *J* = 6.8 Hz, 3H). <sup>13</sup>C-NMR (100 MHz, DMSO-d<sub>6</sub>)  $\delta$  ppm 169.7, 143.3, 142.7, 129.6, 129.5, 128.8, 126.8, 33.4, 31.3, 29.1, 29.0, 29.0, 29.0, 28.9, 28.7 (2C), 28.4, 24.0, 22.1, 14.0. LCMS Method A: Rt 4.24 min, m/z calculated for C<sub>20</sub>H<sub>29</sub>Cl<sub>2</sub>O<sub>5</sub>S [M-H]<sup>-</sup> 451.1118, found 451.1255.

#### HPLC methods

HPLC Method A: Solvent A: 1% HFIP, 0.3% TEA in water. Solvent B: MeOH. Gradient: Linear gradient from 10-30% B over 40 min. UV detection: 260 nm. Column: Phenomenex Gemini 5  $\mu$ m NX-C18 110 Å, 250 x 21.2 mm. System: Waters LC prep purification system.

HPLC Method B: Solvent A: 400 mM HFIP, 15 mM TEA in water. Solvent B: 400 mM HFIP, 15 mM TEA in MeOH. Gradient: Linear gradient from 10-40% B over 5 min. UV detection: 260 nm. Column: Waters Acquity BEH C18 130 Å 1.7  $\mu$ m, 2.1 x 150 mm. Temperature: 60 °C. System: Waters Acquity UPLC system with Acquity QDa mass detector. Ionization mode: Negative (API-ES-).

HPLC Method C: Solvent A: 0.1% TFA in water. Solvent B: 0.1% TFA in acetonitrile. Gradient: Linear gradient from 30-55% B over 40 min. UV detection: 214 nm. Column: Phenomenex Gemini 5  $\mu$ m NX-C18 110 Å, 250 x 30 mm. System: Waters LC prep purification system.

HPLC Method D: Solvent A: 0.1 M TEAA in water. Solvent B: Acetonitrile. Gradient: Linear gradient from 20-40% B over 15 min. UV detection: 260 nm. Column: Phenomenex Clarity 5 $\mu$ m Oligo-RP, 100 x 10 mm. System: Agilent 1200 Infinity LC system.

HPLC Method E: Solvent A: 0.1 M TEAA in water. Solvent B: Acetonitrile. Gradient: Linear gradient from 15-30% B over 15 min. UV detection: 260 nm. Column: Phenomenex Clarity 5  $\mu$ m Oligo-RP, 100 x 10 mm. System: Agilent 1200 Infinity LC system.

HPLC Method F: Solvent A: 400 mM HFIP, 15 mM TEA in water. Solvent B: 400 mM HFIP, 15 mM TEA in MeOH. Gradient: Linear gradient from 20-50% B over 5 min. UV detection: 260 nm. Column: Waters Acquity BEH C18 130Å 1.7  $\mu$ m, 2.1 x 150 mm. Temperature: 60° C. System: Waters Acquity UPLC system with Acquity QDa mass detector. Ionization mode: Negative (API-ES-).

HPLC Method G: Solvent A: 0.1% TFA in water. Solvent B: 0.1% TFA in acetonitrile. Gradient: Linear gradient from 5-60% B over 4 min. UV detection: 214 nm. Column: Waters Acquity BEH C18 130 Å 1.7 µm, 2.1 x 150 mm. Temperature: 40 °C. System: Waters Acquity UPLC system with Acquity QDa mass detector. Ionization mode: Positive (API-ES+).

### LCMS methods

LCMS Method A: Solvent A: Water. Solvent B: Acetonitrile. Solvent C: 100 mM triethylammonium acetate in water:acetonitrile 1:1, pH 7.8. Gradient: 2.5% C + linear gradient from 0-97.5% B over 4.5 min. UV detection: 214 nm. Column: Waters Acquity BEH C18 130 Å 1.7 µm, 2.1 x 50 mm. Temperature: 40 °C. System: Waters Xevo G2-XS QToF. Ionization mode: Negative (API-ES-).

LCMS Method B: Solvent A: Water. Solvent B: Acetonitrile. Solvent C: 2% formic acid + 0.1% TFA in water. Gradient: 5% C + linear gradient from 5-90% B over 4 min. UV detection: 214 nm. Column: Waters Acquity BEH C18 130 Å 1.7 µm, 2.1 x 50 mm. Temperature: 40 °C. System: Waters Xevo G2-XS QToF. Ionization mode: Positive (API-ES+).

LCMS Method C: Solvent A: Water. Solvent B: Acetonitrile. Solvent C: 50 mM ammonium formate in water, pH 9. Gradient: 5% C + linear gradient from 0-95% B over 4 min. UV detection: 214 nm. Column: Waters Acquity BEH C18 130 Å 1.7 µm, 2.1 x 50 mm. Temperature: 40 °C. System: Waters Xevo G2-XS QToF. Ionization mode: Negative (API-ES-).

### Compound mass analysis

All ONs, peptides, and peptide-ON conjugates were analyzed by QDa mass detection during HPLC analysis and final conjugates were also analyzed by LCMS. Mass detection with QDa was done with HPLC method B for unmodified and amino-modified ONs, and with HPLC method F for DCSP-modified and peptide-conjugated ONs. For LCMS analysis, ONs and conjugates were both analyzed by LCMS method A. Free peptides were analyzed by HPLC method G and LCMS method B.

| Compound                            | Calc. molar mass (Da) | QDa found ion                     | QDa calcd. ion mass (Da) | QDa found mass (Da) | LCMS deconv. found mass (Da) |
|-------------------------------------|-----------------------|-----------------------------------|--------------------------|---------------------|------------------------------|
| <b>Antisense strands</b>            |                       |                                   |                          |                     |                              |
| AS HPRT1                            | 7682.0                | [M-H <sub>7</sub> ] <sup>-7</sup> | 1096.4                   | 1096.3              | 7682                         |
| AS NTC                              | 7739.0                | [M-H <sub>7</sub> ] <sup>-7</sup> | 1104.6                   | 1104.6              | 7739                         |
| <b>Sense strands</b>                |                       |                                   |                          |                     |                              |
| SS HPRT1                            | 6791.2                | [M-H <sub>7</sub> ] <sup>-7</sup> | 969.2                    | 969.2               | 6791                         |
| SS NTC                              | 6757.3                | [M-H <sub>8</sub> ] <sup>-8</sup> | 843.7                    | 843.7               | 6757                         |
| <b>Amino-modified sense strands</b> |                       |                                   |                          |                     |                              |
| SS HPRT1 5'-amino                   | 6970.4                | [M-H <sub>6</sub> ] <sup>-6</sup> | 1160.7                   | 1160.7              | 6971                         |
| SS HPRT1 P1-amino                   | 6881.3                | [M-H <sub>6</sub> ] <sup>-6</sup> | 1145.9                   | 1145.8              | -                            |
| SS HPRT1 P2-amino                   | 6881.3                | [M-H <sub>7</sub> ] <sup>-7</sup> | 982.0                    | 982.0               | -                            |
| SS HPRT1 P3-amino                   | 6897.4                | [M-H <sub>6</sub> ] <sup>-6</sup> | 1148.6                   | 1148.4              | -                            |
| SS HPRT1 P4-amino                   | 6897.4                | [M-H <sub>7</sub> ] <sup>-7</sup> | 984.3                    | 984.3               | -                            |
| SS HPRT1 P5-amino                   | 6897.4                | [M-H <sub>6</sub> ] <sup>-6</sup> | 1148.6                   | 1148.5              | -                            |
| SS HPRT1 P6-amino                   | 6897.4                | [M-H <sub>7</sub> ] <sup>-7</sup> | 984.3                    | 984.4               | -                            |

|                                       |        |                                   |        |        |      |
|---------------------------------------|--------|-----------------------------------|--------|--------|------|
| SS HPRT1 P7-amino                     | 6897.4 | [M-H <sub>6</sub> ] <sup>-6</sup> | 1148.6 | 1148.5 | -    |
| SS HPRT1 P8-amino                     | 6897.4 | [M-H <sub>7</sub> ] <sup>-7</sup> | 984.3  | 984.4  | -    |
| SS HPRT1 P9-amino                     | 6897.4 | [M-H <sub>6</sub> ] <sup>-6</sup> | 1148.6 | 1148.4 | -    |
| SS HPRT1 P10-amino                    | 6897.4 | [M-H <sub>6</sub> ] <sup>-6</sup> | 1148.6 | 1148.5 | -    |
| SS HPRT1 P11-amino                    | 6897.4 | [M-H <sub>7</sub> ] <sup>-7</sup> | 984.3  | 984.4  | -    |
| SS HPRT1 P12-amino                    | 6897.4 | [M-H <sub>6</sub> ] <sup>-6</sup> | 1148.6 | 1148.5 | -    |
| SS HPRT1 P13-amino                    | 6897.4 | [M-H <sub>6</sub> ] <sup>-6</sup> | 1148.6 | 1148.6 | -    |
| SS HPRT1 P14-amino                    | 6897.4 | [M-H <sub>6</sub> ] <sup>-6</sup> | 1148.6 | 1148.5 | -    |
| SS HPRT1 P15-amino                    | 6897.4 | [M-H <sub>6</sub> ] <sup>-6</sup> | 1148.6 | 1148.5 | -    |
| SS HPRT1 P16-amino                    | 6897.4 | [M-H <sub>7</sub> ] <sup>-7</sup> | 984.3  | 984.4  | -    |
| SS HPRT1 P17-amino                    | 6897.4 | [M-H <sub>7</sub> ] <sup>-7</sup> | 984.3  | 984.3  | -    |
| SS HPRT1 P18-amino                    | 6897.4 | [M-H <sub>7</sub> ] <sup>-7</sup> | 984.3  | 984.3  | -    |
| SS HPRT1 P19-amino                    | 6897.4 | [M-H <sub>6</sub> ] <sup>-6</sup> | 1148.6 | 1148.5 | -    |
| SS HPRT1 P20-amino                    | 6897.4 | [M-H <sub>6</sub> ] <sup>-6</sup> | 1148.6 | 1148.5 | -    |
| SS HPRT1 3'-amino                     | 6970.4 | [M-H <sub>6</sub> ] <sup>-6</sup> | 1160.7 | 1160.7 | 6971 |
| SS NTC 3'-amino                       | 6936.4 | [M-H <sub>6</sub> ] <sup>-6</sup> | 1155.1 | 1155.2 | 6937 |
| SS HPRT1 C5-10-amino                  | 6873.3 | [M-H <sub>6</sub> ] <sup>-6</sup> | 1144.6 | 1144.4 | 6873 |
| SS HPRT1 2'-10-amino                  | 6834.3 | [M-H <sub>7</sub> ] <sup>-7</sup> | 975.3  | 975.3  | 6833 |
| <b>DCSP-modified sense strands</b>    |        |                                   |        |        |      |
| SS HPRT1 5'-DCSP                      | 7407.7 | [M-H <sub>7</sub> ] <sup>-7</sup> | 1057.2 | 1057.3 | -    |
| SS HPRT1 P1-DCSP                      | 7318.6 | [M-H <sub>7</sub> ] <sup>-7</sup> | 1044.5 | 1044.5 | -    |
| SS HPRT1 P2-DCSP                      | 7318.6 | [M-H <sub>6</sub> ] <sup>-6</sup> | 1218.8 | 1218.7 | -    |
| SS HPRT1 P3-DCSP                      | 7334.7 | [M-H <sub>7</sub> ] <sup>-7</sup> | 1046.8 | 1046.8 | -    |
| SS HPRT1 P4-DCSP                      | 7334.7 | [M-H <sub>7</sub> ] <sup>-7</sup> | 1046.8 | 1046.8 | -    |
| SS HPRT1 P5-DCSP                      | 7334.7 | [M-H <sub>7</sub> ] <sup>-7</sup> | 1046.8 | 1046.8 | -    |
| SS HPRT1 P6-DCSP                      | 7334.7 | [M-H <sub>7</sub> ] <sup>-7</sup> | 1046.8 | 1046.8 | -    |
| SS HPRT1 P7-DCSP                      | 7334.7 | [M-H <sub>7</sub> ] <sup>-7</sup> | 1046.8 | 1046.8 | -    |
| SS HPRT1 P8-DCSP                      | 7334.7 | [M-H <sub>6</sub> ] <sup>-6</sup> | 1221.5 | 1221.4 | -    |
| SS HPRT1 P9-DCSP                      | 7334.7 | [M-H <sub>7</sub> ] <sup>-7</sup> | 1046.8 | 1046.8 | -    |
| SS HPRT1 P10-DCSP                     | 7334.7 | [M-H <sub>6</sub> ] <sup>-6</sup> | 1221.5 | 1221.4 | -    |
| SS HPRT1 P11-DCSP                     | 7334.7 | [M-H <sub>6</sub> ] <sup>-6</sup> | 1221.5 | 1221.4 | -    |
| SS HPRT1 P12-DCSP                     | 7334.7 | [M-H <sub>7</sub> ] <sup>-7</sup> | 1046.8 | 1046.8 | -    |
| SS HPRT1 P13-DCSP                     | 7334.7 | [M-H <sub>7</sub> ] <sup>-7</sup> | 1046.8 | 1046.7 | -    |
| SS HPRT1 P14-DCSP                     | 7334.7 | [M-H <sub>6</sub> ] <sup>-6</sup> | 1221.5 | 1221.3 | -    |
| SS HPRT1 P15-DCSP                     | 7334.7 | [M-H <sub>6</sub> ] <sup>-6</sup> | 1221.5 | 1221.4 | -    |
| SS HPRT1 P16-DCSP                     | 7334.7 | [M-H <sub>7</sub> ] <sup>-7</sup> | 1046.8 | 1046.7 | -    |
| SS HPRT1 P17-DCSP                     | 7334.7 | [M-H <sub>7</sub> ] <sup>-7</sup> | 1046.8 | 1046.7 | -    |
| SS HPRT1 P18-DCSP                     | 7334.7 | [M-H <sub>8</sub> ] <sup>-8</sup> | 915.8  | 915.7  | -    |
| SS HPRT1 P19-DCSP                     | 7334.7 | [M-H <sub>7</sub> ] <sup>-7</sup> | 1046.8 | 1046.8 | -    |
| SS HPRT1 P20-DCSP                     | 7334.7 | [M-H <sub>7</sub> ] <sup>-7</sup> | 1046.8 | 1046.9 | -    |
| SS HPRT1 3'-DCSP                      | 7407.7 | [M-H <sub>8</sub> ] <sup>-8</sup> | 925.0  | 925.1  | -    |
| SS NTC 3'-DCSP                        | 7373.7 | [M-H <sub>7</sub> ] <sup>-7</sup> | 1052.4 | 1052.4 | -    |
| SS HPRT1 C5-10-DCSP                   | 7310.7 | [M-H <sub>7</sub> ] <sup>-7</sup> | 1043.4 | 1043.3 | -    |
| SS HPRT1 2'-10-DCSP                   | 7271.6 | [M-H <sub>7</sub> ] <sup>-7</sup> | 1037.8 | 1037.7 | -    |
| <b>Peptide-modified sense strands</b> |        |                                   |        |        |      |

|                  |         |                                   |        |        |       |
|------------------|---------|-----------------------------------|--------|--------|-------|
| SS HPRT1 5'-B    | 10548.4 | [M-H <sub>9</sub> ] <sup>-9</sup> | 1171.0 | 1171.0 | 10549 |
| SS HPRT1 5'-A    | 10704.6 | [M-H <sub>9</sub> ] <sup>-9</sup> | 1188.4 | 1188.3 | 10705 |
| SS HPRT1 P1-A    | 10615.5 | [M-H <sub>9</sub> ] <sup>-9</sup> | 1178.5 | 1178.5 | 10616 |
| SS HPRT1 P2-A    | 10615.5 | [M-H <sub>9</sub> ] <sup>-9</sup> | 1178.5 | 1178.5 | 10616 |
| SS HPRT1 P3-A    | 10631.6 | [M-H <sub>9</sub> ] <sup>-9</sup> | 1180.3 | 1180.1 | 10632 |
| SS HPRT1 P4-A    | 10631.6 | [M-H <sub>9</sub> ] <sup>-9</sup> | 1180.3 | 1180.2 | 10632 |
| SS HPRT1 P5-A    | 10631.6 | [M-H <sub>9</sub> ] <sup>-9</sup> | 1180.3 | 1180.2 | 10632 |
| SS HPRT1 P6-A    | 10631.6 | [M-H <sub>9</sub> ] <sup>-9</sup> | 1180.3 | 1180.2 | 10632 |
| SS HPRT1 P7-A    | 10631.6 | [M-H <sub>9</sub> ] <sup>-9</sup> | 1180.3 | 1180.2 | 10632 |
| SS HPRT1 P8-A    | 10631.6 | [M-H <sub>9</sub> ] <sup>-9</sup> | 1180.3 | 1180.1 | 10632 |
| SS HPRT1 P9-A    | 10631.6 | [M-H <sub>9</sub> ] <sup>-9</sup> | 1180.3 | 1180.2 | 10632 |
| SS HPRT1 P10-A   | 10631.6 | [M-H <sub>9</sub> ] <sup>-9</sup> | 1180.3 | 1180.0 | 10632 |
| SS HPRT1 P11-A   | 10631.6 | [M-H <sub>9</sub> ] <sup>-9</sup> | 1180.3 | 1180.2 | 10632 |
| SS HPRT1 P12-A   | 10631.6 | [M-H <sub>9</sub> ] <sup>-9</sup> | 1180.3 | 1180.2 | 10632 |
| SS HPRT1 P13-A   | 10631.6 | [M-H <sub>9</sub> ] <sup>-9</sup> | 1180.3 | 1180.3 | 10632 |
| SS HPRT1 P14-A   | 10631.6 | [M-H <sub>9</sub> ] <sup>-9</sup> | 1180.3 | 1180.0 | 10632 |
| SS HPRT1 P15-A   | 10631.6 | [M-H <sub>9</sub> ] <sup>-9</sup> | 1180.3 | 1180.0 | 10632 |
| SS HPRT1 P16-A   | 10631.6 | [M-H <sub>9</sub> ] <sup>-9</sup> | 1180.3 | 1180.2 | 10632 |
| SS HPRT1 P17-A   | 10631.6 | [M-H <sub>9</sub> ] <sup>-9</sup> | 1180.3 | 1180.1 | 10632 |
| SS HPRT1 P18-A   | 10631.6 | [M-H <sub>9</sub> ] <sup>-9</sup> | 1180.3 | 1180.1 | 10632 |
| SS HPRT1 P19-A   | 10631.6 | [M-H <sub>9</sub> ] <sup>-9</sup> | 1180.3 | 1180.3 | 10632 |
| SS HPRT1 P20-A   | 10631.6 | [M-H <sub>9</sub> ] <sup>-9</sup> | 1180.3 | 1180.1 | 10632 |
| SS HPRT1 3'-A    | 10704.6 | [M-H <sub>9</sub> ] <sup>-9</sup> | 1188.4 | 1188.4 | 10705 |
| SS HPRT1 3'-B    | 10548.4 | [M-H <sub>9</sub> ] <sup>-9</sup> | 1171.0 | 1171.0 | 10549 |
| SS HPRT1 3'-C    | 10704.6 | [M-H <sub>9</sub> ] <sup>-9</sup> | 1188.4 | 1188.3 | 10705 |
| SS NTC 3'-A      | 10670.6 | [M-H <sub>9</sub> ] <sup>-9</sup> | 1184.6 | 1184.6 | 10671 |
| SS HPRT1 C5-10-A | 10607.5 | [M-H <sub>9</sub> ] <sup>-9</sup> | 1177.6 | 1177.4 | 10608 |
| SS HPRT1 2'-10-A | 10568.5 | [M-H <sub>9</sub> ] <sup>-9</sup> | 1173.3 | 1173.3 | 10569 |
| <b>Peptides</b>  |         |                                   |        |        |       |
| A                | 3539.9  | [M+H <sub>3</sub> ] <sup>+3</sup> | 1181.0 | 1180.8 | 3540  |
| B                | 3383.7  | [M+H <sub>3</sub> ] <sup>+3</sup> | 1128.9 | 1128.8 | 3385  |
| C                | 3539.9  | [M+H <sub>3</sub> ] <sup>+3</sup> | 1181.0 | 1180.7 | 3540  |

## NMR spectra

<sup>1</sup>H-NMR (400 MHz, CDCl<sub>3</sub>)

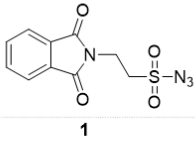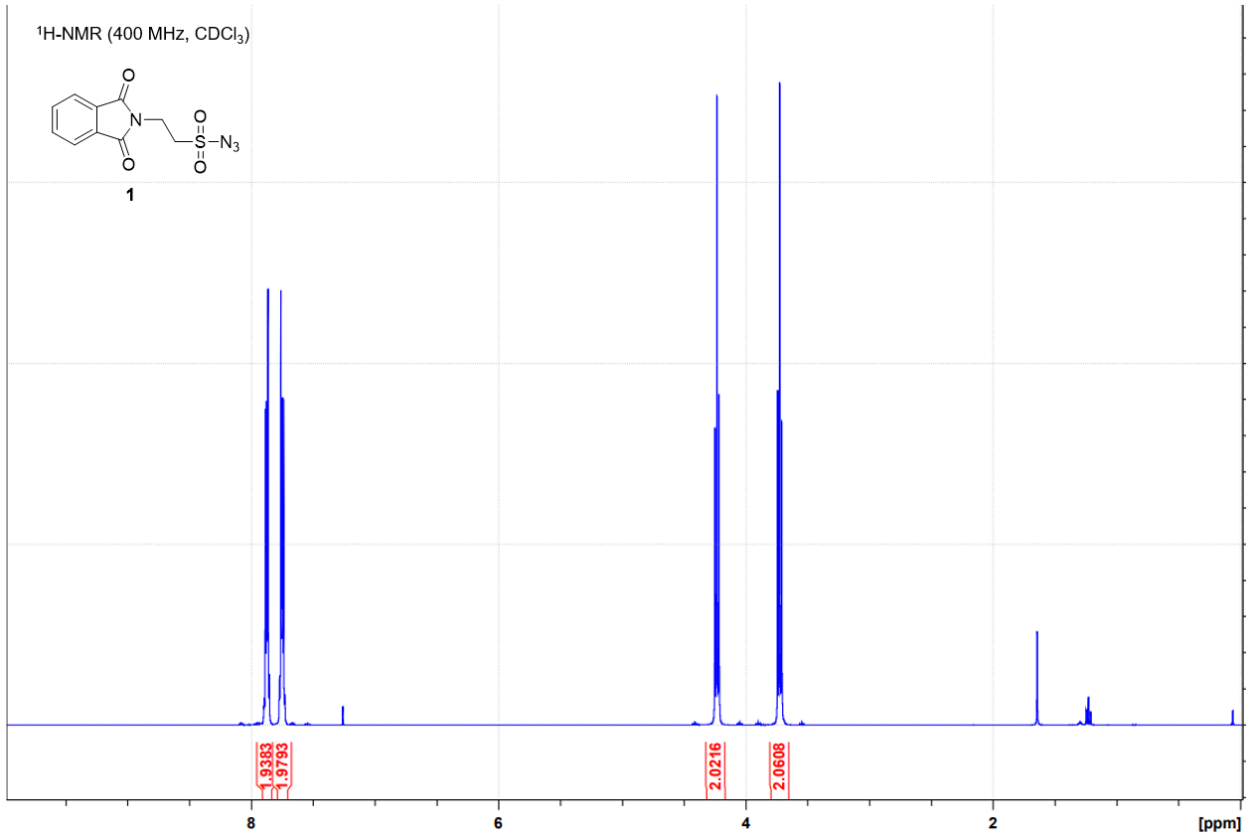

<sup>13</sup>C-NMR (100 MHz, CDCl<sub>3</sub>)

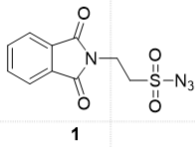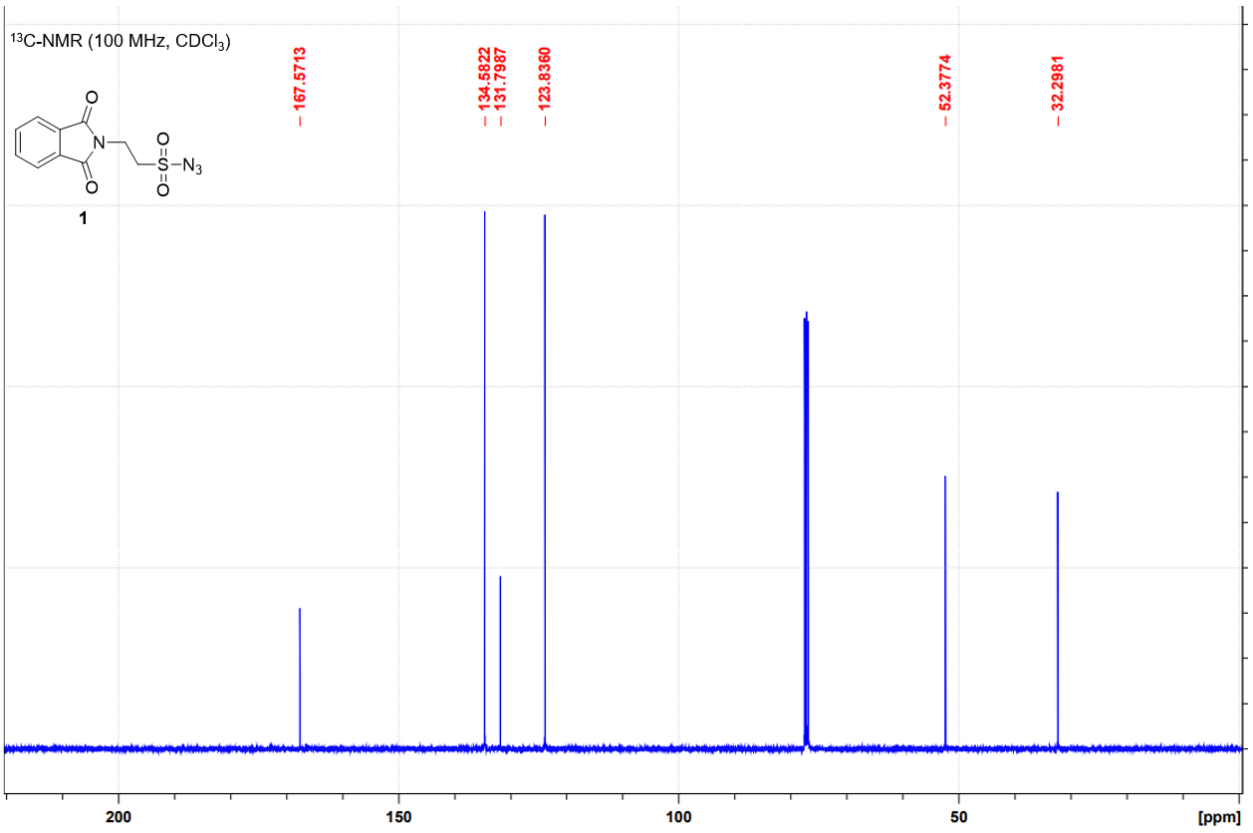

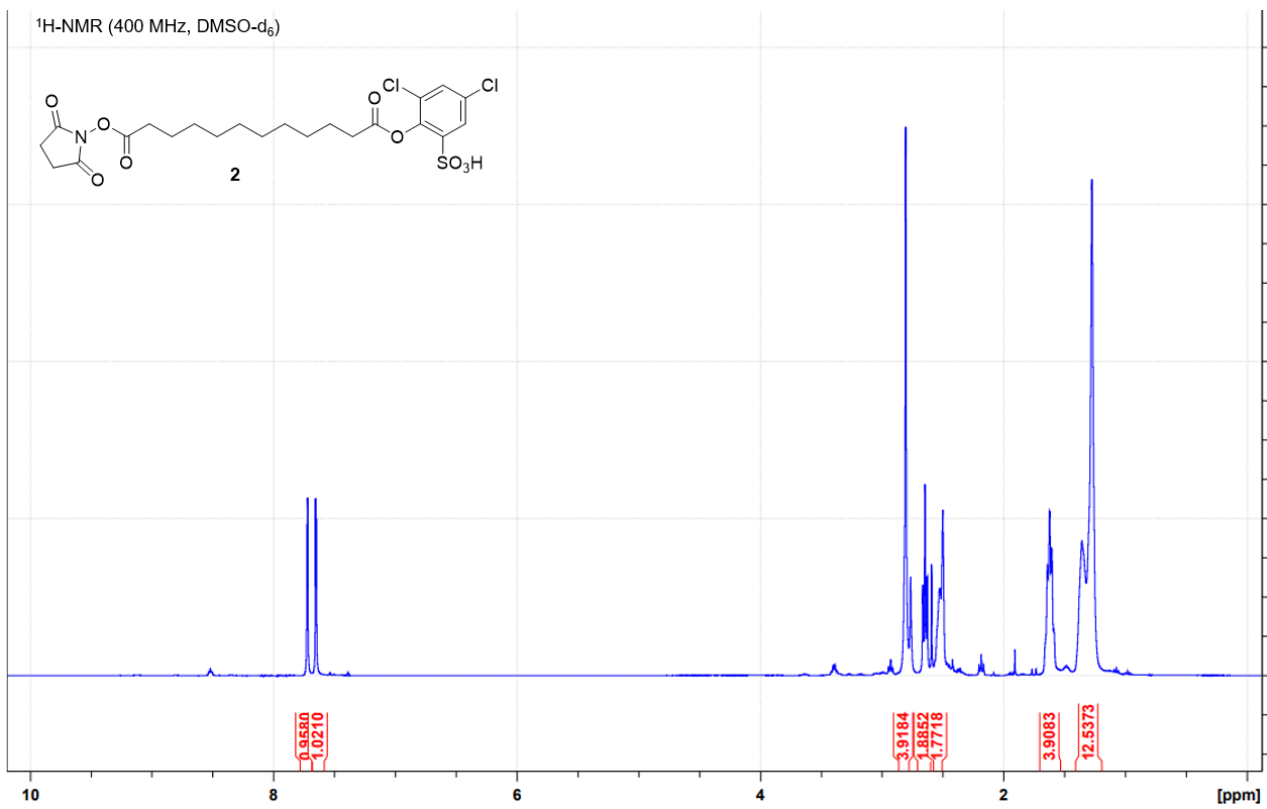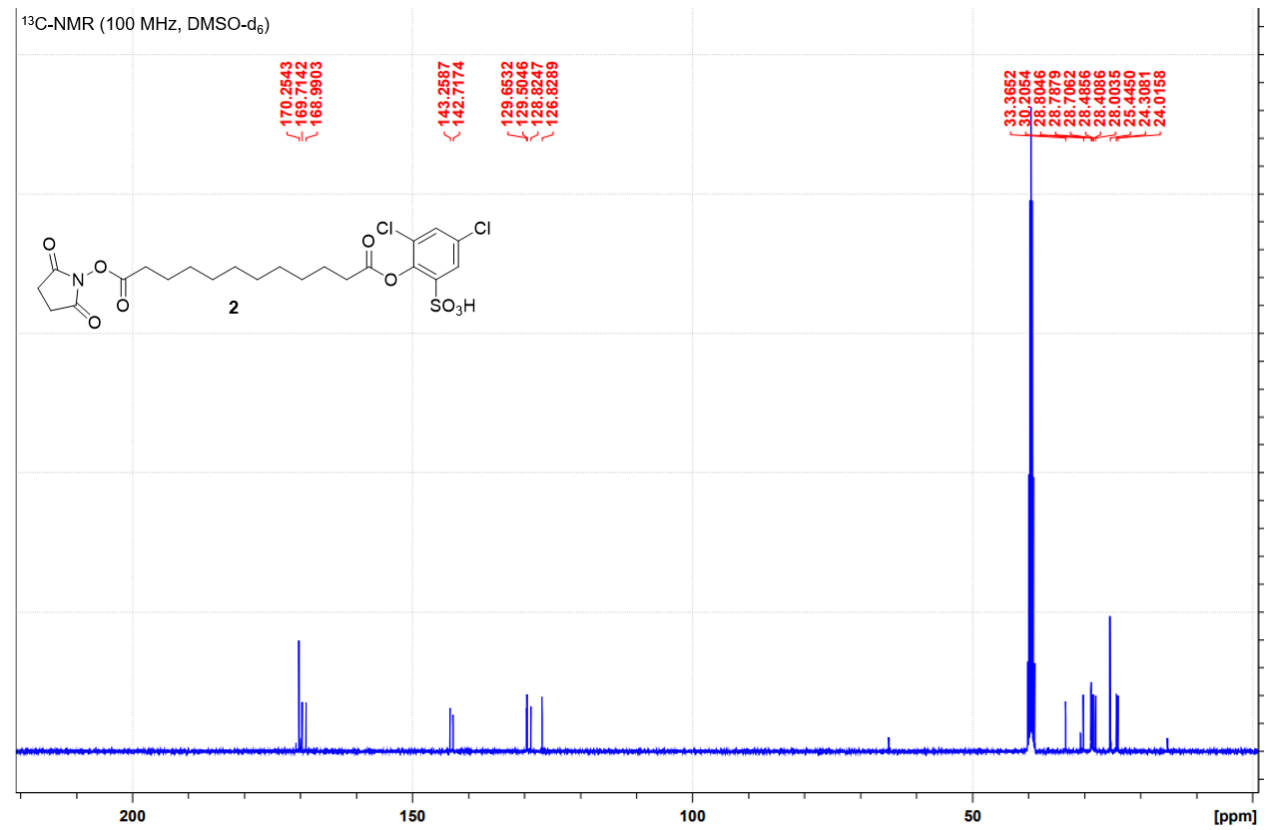

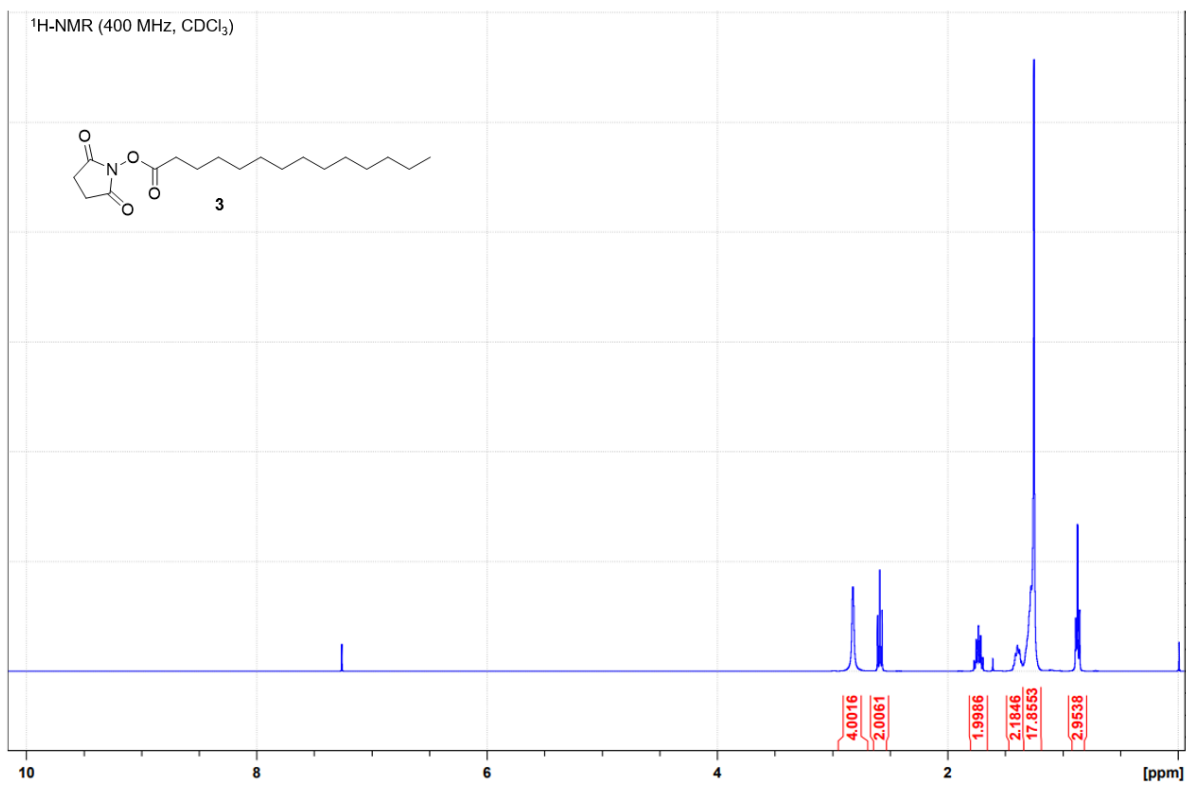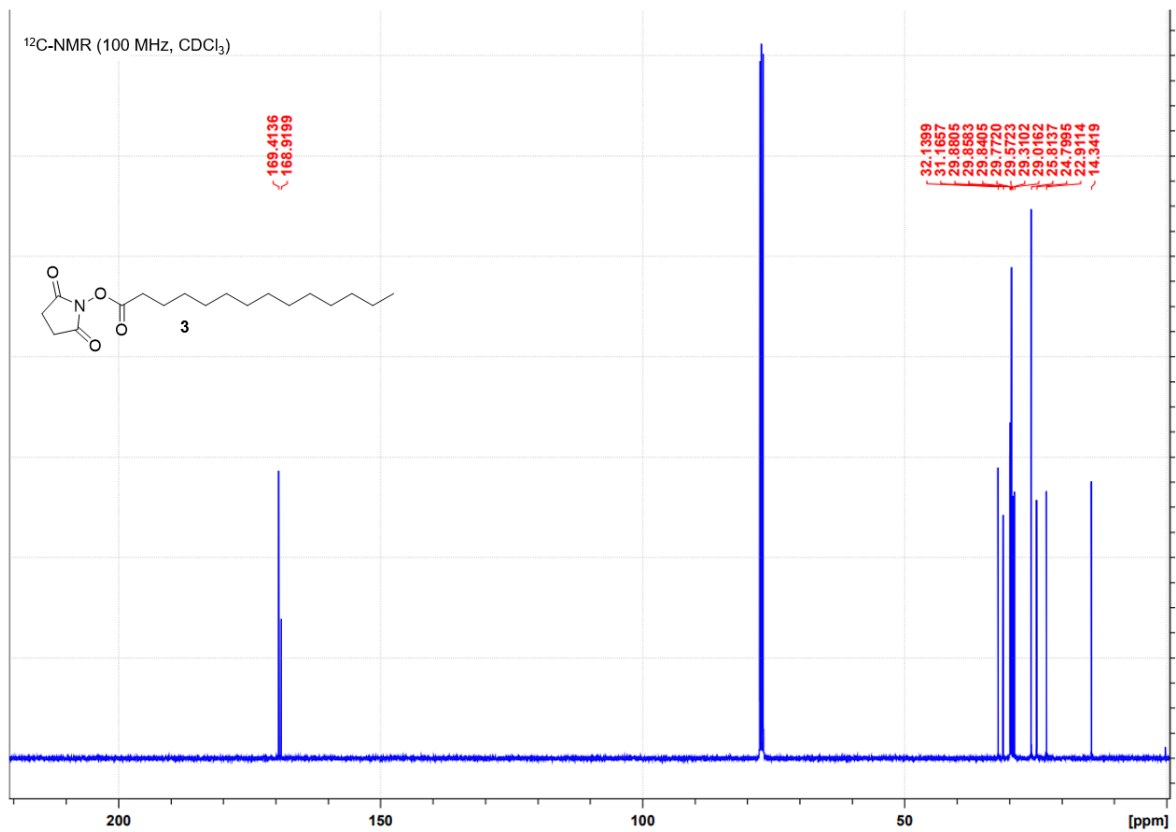

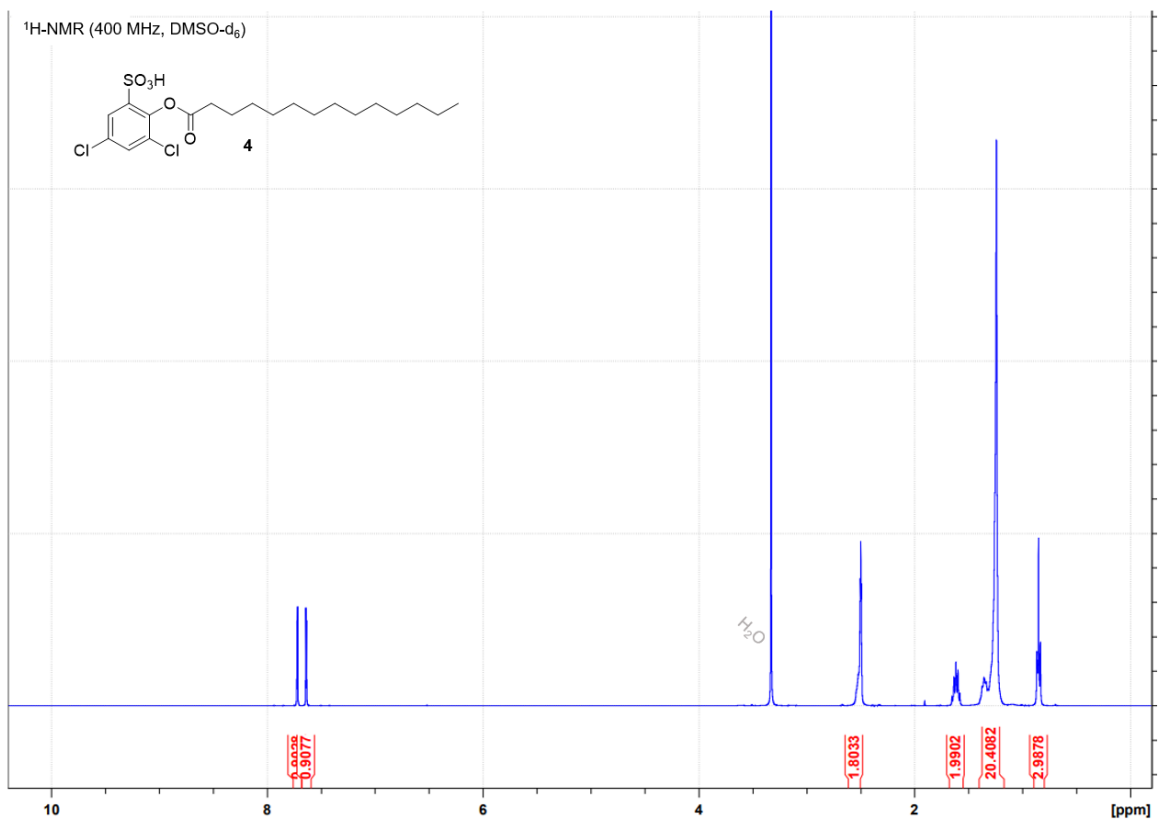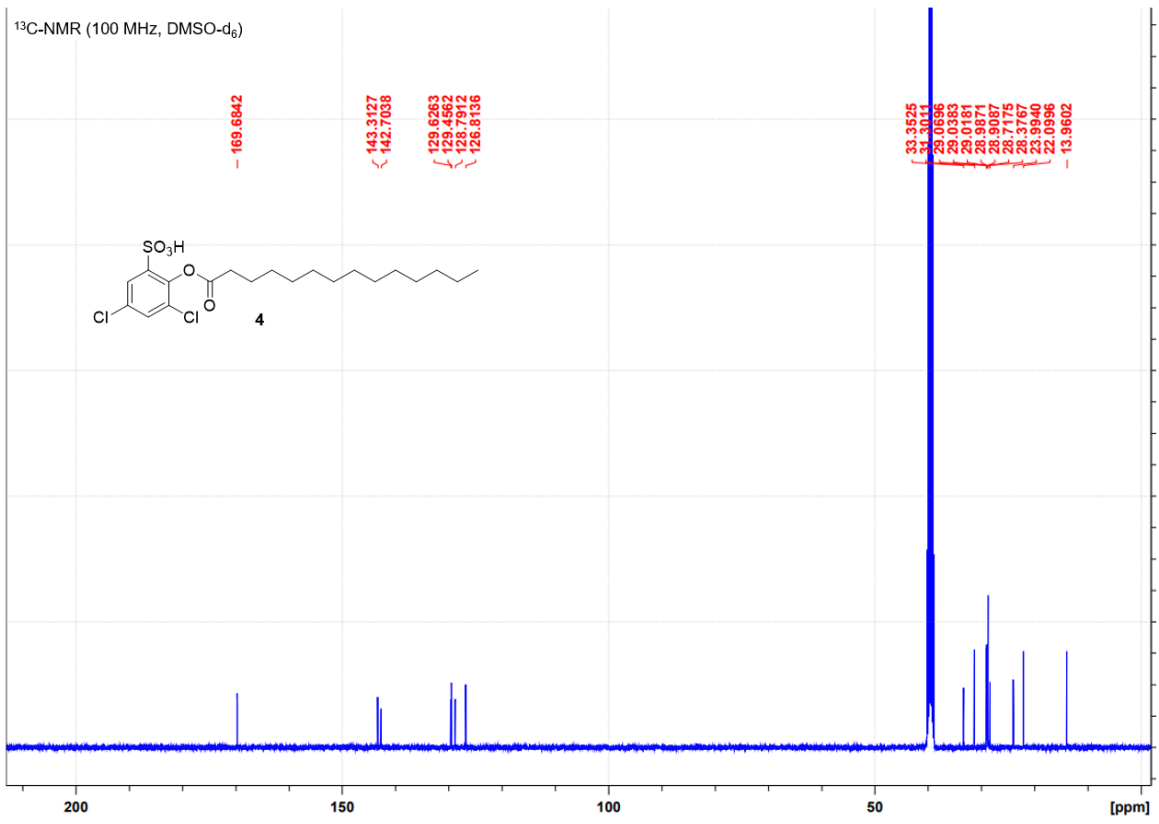

Supplement: gkad1015_supplemental_file.pdf [file gkad1015_supplemental_file.pdf]
